# Supplementary material
Source: publisher figshare collection journal article supplement (https://springernature.figshare.com/ndownloader/files/18108005)
Supplement: Supplementary file 1 [file 18108005]

**Table S1**. Multivariate analysis of factors associated with CRC

|  |  | Cases | Controls | OR(95%CI) | P value |
| --- | --- | --- | --- | --- | --- |
|  |  |  |  |  |  |
| Genotype | C/C | 36 | 38 | Ref |  |
|  | C/T | 65 | 100 | 0.67 (0.38-1.18) | 0.17 |
|  | T/T | 20 | 59 | 0.32 (0.15-0.63) | 0.001 |
|  |  |  |  |  |  |
| Sex | Female | 43 | 66 | Ref |  |
|  | Male | 78 | 131 | 1.29 (0.73-2.23) | 0.39 |
|  |  |  |  |  |  |
| Smoking | No | 61 | 74 | Ref |  |
|  | Yes | 60 | 123 | 0.47 (0.27-0.82) | 0.007 |
|  |  |  |  |  |  |
| Age |  | 64.3 (11.2) | 65.5 (17.3) | 0.99 (0.98-1.01) | 0.32 |

**Table S2**. Multivariate analysis of factors associated with CRC stratified by smoking status

| Never smoker |  | Cases | Controls | OR(95%CI) | P value |
| --- | --- | --- | --- | --- | --- |
| Genotype | C/C | 18 | 11 | Ref |  |
|  | C/T | 29 | 36 | 0.48 (0.19-1.18) | 0.11 |
|  | T/T | 14 | 27 | 0.31 (0.11-0.84) | 0.02 |
| Sex | Female | 35 | 50 | Ref |  |
|  | Male | 26 | 24 | 1.47 (0.72-3.03) | 0.3 |
|  |  |  |  |  |  |
| Age |  | 64.02 (17.26) | 66.16 (15.86) | 0.99 (0.97-1.01) | 0.32 |
|  |  |  |  |  |  |
| Smoker |  | Cases | Controls | OR(95%CI) | P value |
| Genotype | C/C | 18 | 27 | Ref |  |
|  | C/T | 36 | 64 | 0.85 (0.42-1.78) | 0.67 |
|  | T/T | 6 | 32 | 0.28(0.09-0.77) | 0.02 |
| Sex | Female | 8 | 16 | Ref |  |
|  | Male | 52 | 107 | 1.06 (0.42-2.88) | 0.9 |
|  |  |  |  |  |  |
| Age |  | 64 (11.18) | 65.63 (14.49) | 0.99 (0.97-1.01) | 0.4 |

**Table S3**. Multivariate analysis of factors associated with CRC stratified by sex

| Male | Genotype | Cases | Controls | OR(95%CI) | P value |
| --- | --- | --- | --- | --- | --- |
|  |  |  |  |  |  |
| Genotype | C/C | 24 | 27 | Ref |  |
|  | C/T | 45 | 67 | 0.76 (0.39-1.51) | 0.44 |
|  | T/T | 9 | 37 | 0.23 (0.09-0.59) | 0.003 |
|  |  |  |  |  |  |
| Smoking | No | 26 | 24 | Ref |  |
|  | Yes | 52 | 107 | 0.41 (0.21-0.8) | 0.01 |
|  |  |  |  |  |  |
| Age |  | 64.9 (10.77) | 66.12 (14.01) | 0.99 (0.97-1.01) | 0.35 |
|  |  |  |  |  |  |
| Female | Genotype | Cases | Controls | OR(95%CI) | P value |
|  |  |  |  |  |  |
| Genotype | C/C | 12 | 11 | Ref |  |
|  | C/T | 20 | 33 | 0.53 (0.19-1.44) | 0.22 |
|  | T/T | 11 | 22 | 0.43 (0.14-1.28) | 0.13 |
| Smoking | No | 35 | 50 | Ref |  |
|  | Yes | 8 | 16 | 0.64 (0.23-1.67) | 0.37 |
|  |  |  |  |  |  |
| Age |  | 63.12 (12.08) | 64.2 (22.6) | 0.99 (0.97-1.02) | 0.57 |
